# Supplementary material for: TGF-β signalling limits effector function capacity of NK cell anti-tumour immunity in human bladder cancer
Source: PubMed Central journal article supplement — eBioMedicine. 2024 May 28;104:105176. doi: 10.1016/j.ebiom.2024.105176 (PMC11154198; doi:10.1016/j.ebiom.2024.105176), 2024-05-28

# Sup. Fig 1

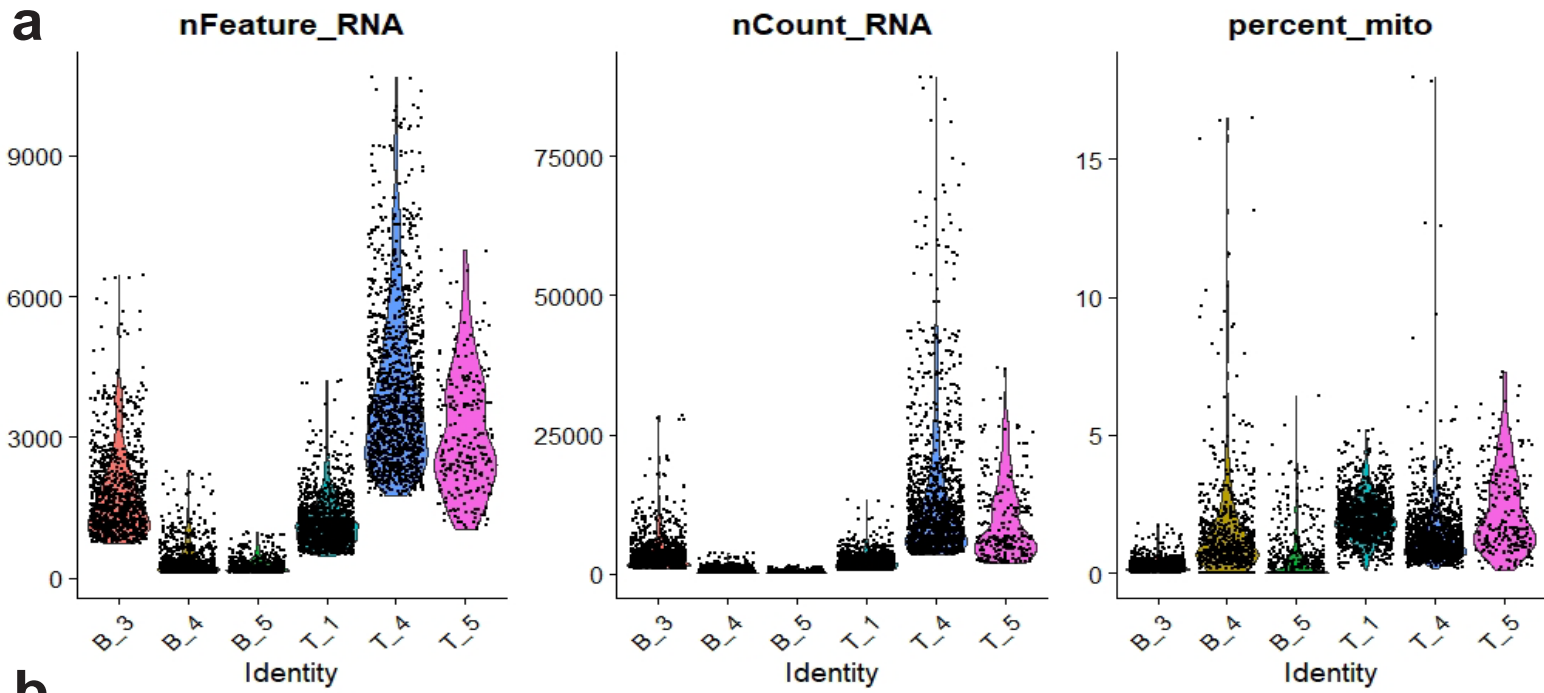

**b**

| Sample | nFeature.min | nFeature.max | nCount.max | Mitochondrial Contamination |
|--------|--------------|--------------|------------|-----------------------------|
| B3     | 200          | 5000         | 25000      | 7%                          |
| B4     | 200          | 3000         | 3500       | 7%                          |
| B5     | 200          | 3000         | 3000       | 7%                          |
| T3     | 200          | 4000         | 10000      | 7%                          |
| T4     | 200          | 10000        | 50000      | 7%                          |
| T5     | 200          | 6000         | 30000      | 7%                          |

**c**

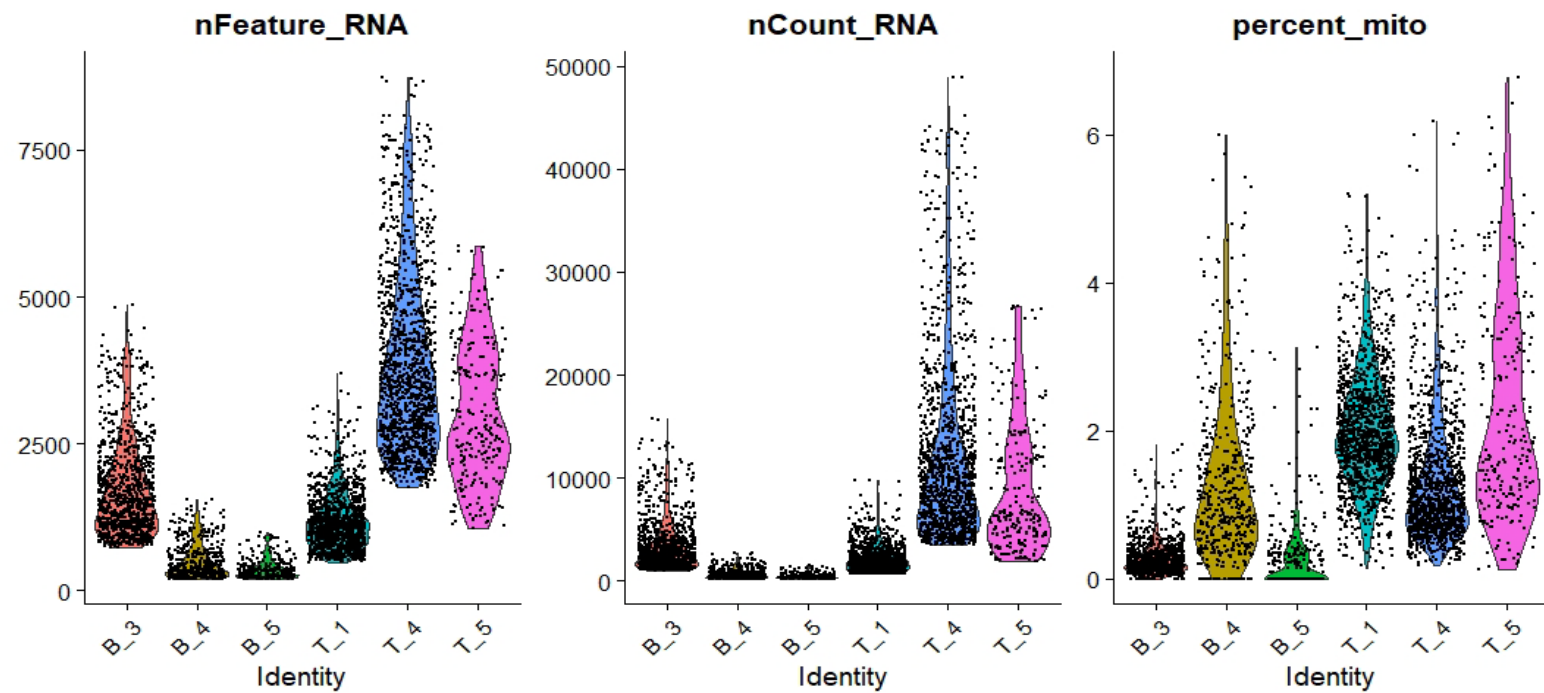

# Sup. Fig 2

**a**

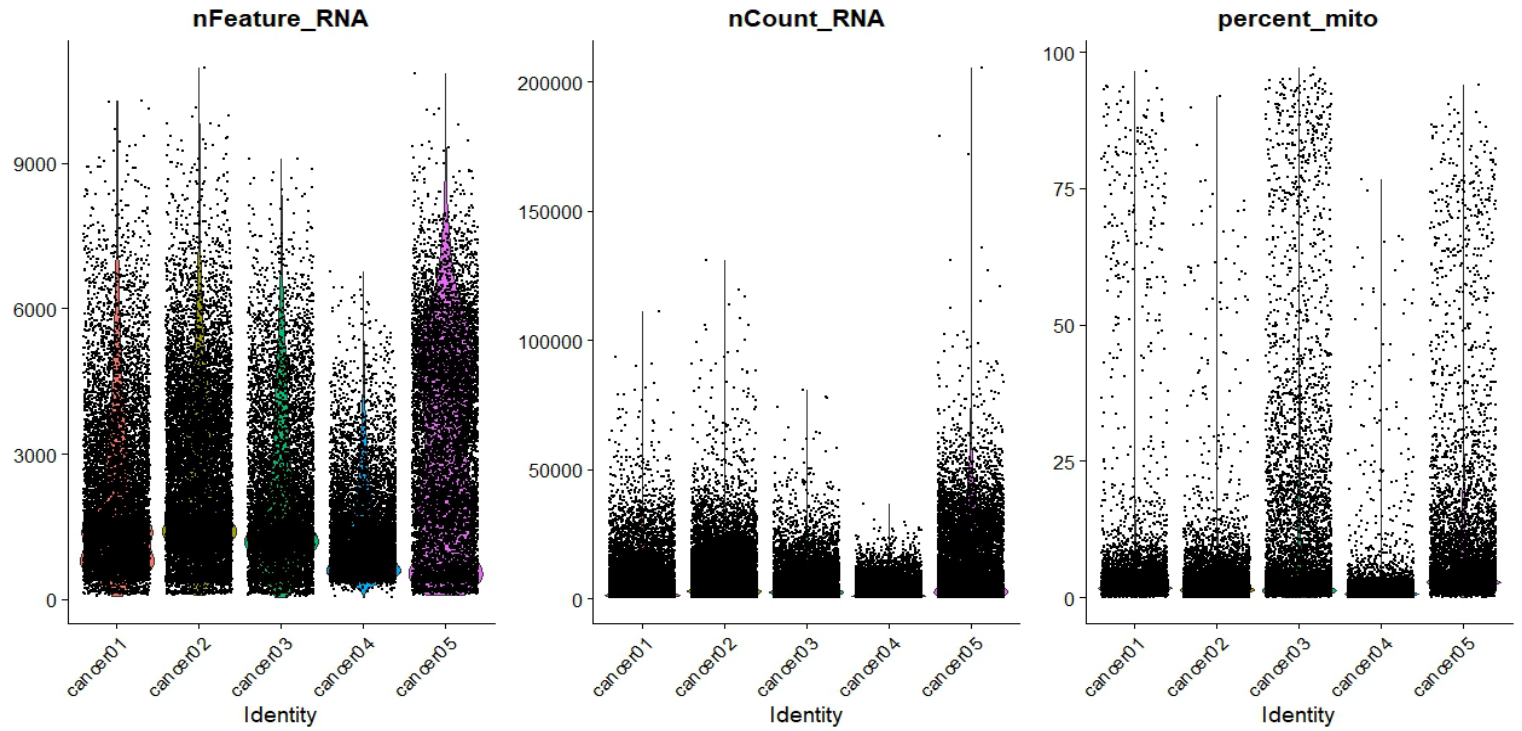

**b**

| Sample   | nFeature.max | nCount.min | Mitochondrial Contamination |
|----------|--------------|------------|-----------------------------|
| Cancer01 | 6000         | 1000       | 10%                         |
| Cancer02 | 6000         | 1000       | 10%                         |
| Cancer03 | 6000         | 1000       | 10%                         |
| Cancer04 | 6000         | 1000       | 10%                         |
| Cancer05 | 6000         | 1000       | 10%                         |

**c**

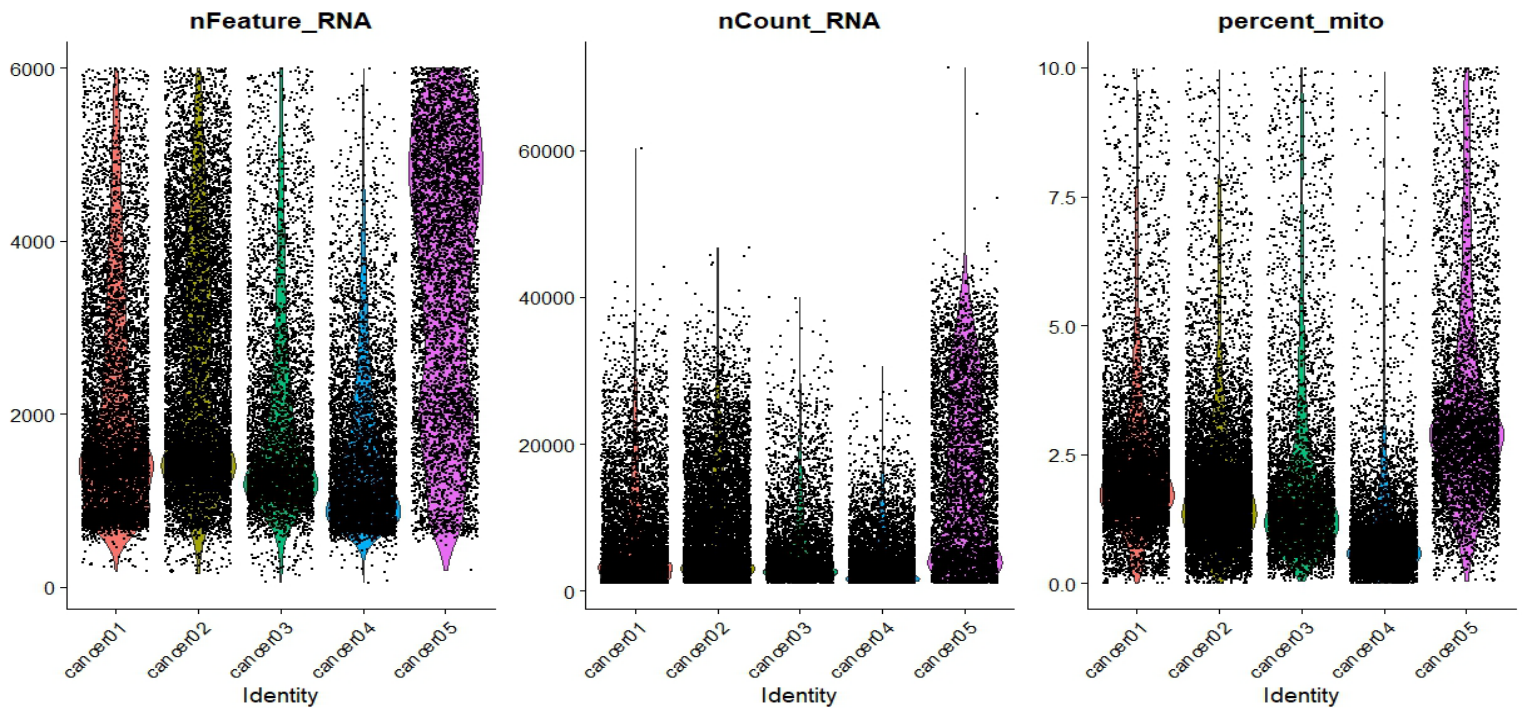

# Sup. Fig 3

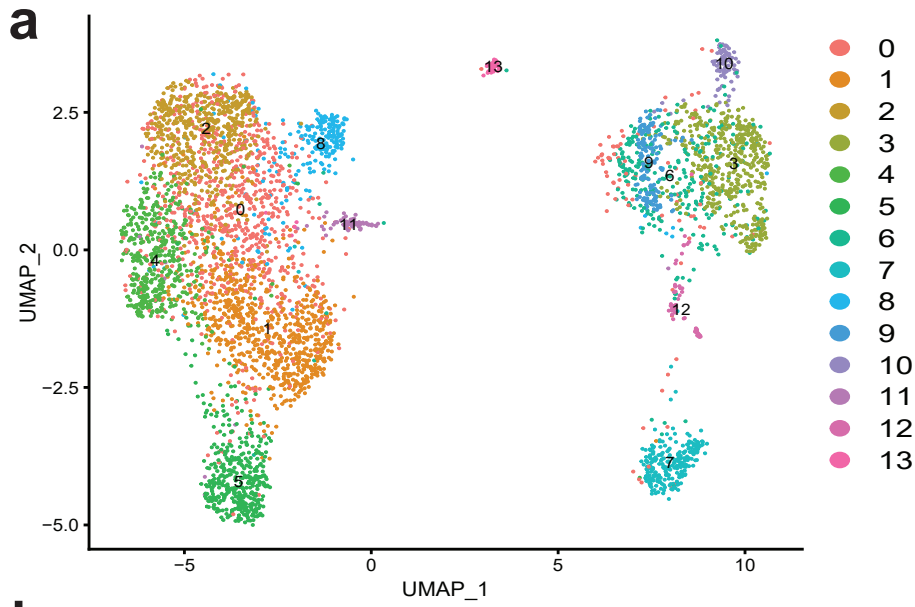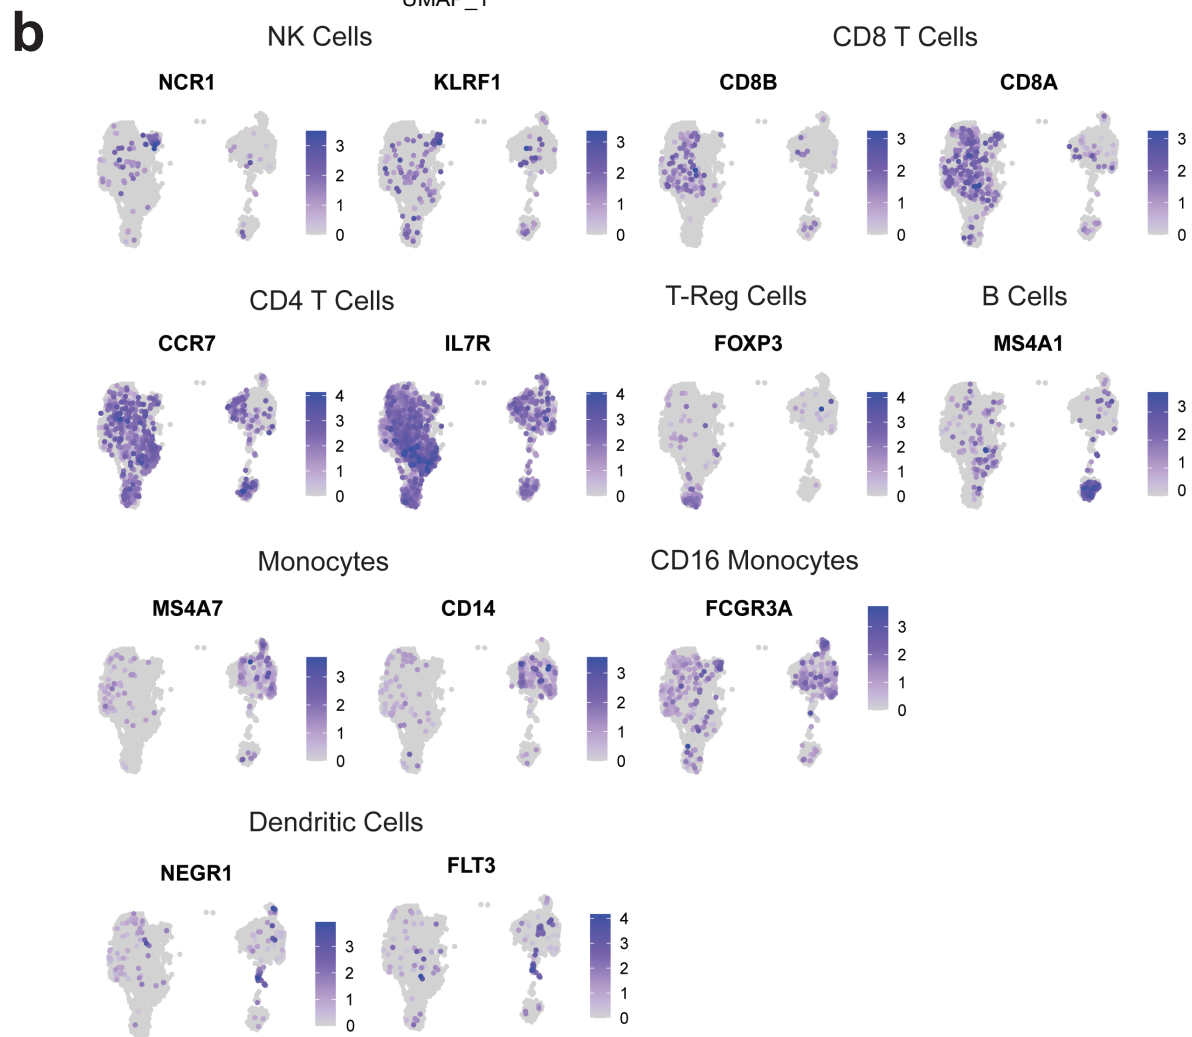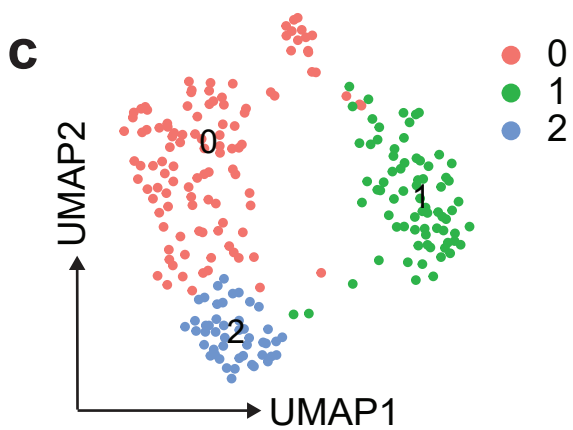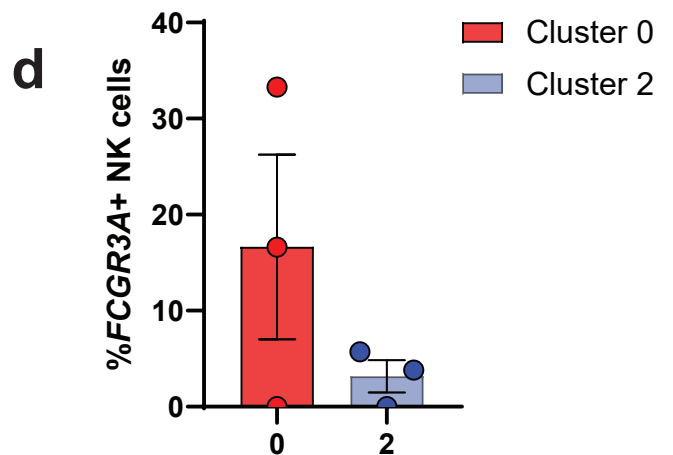

# Sup. Fig 4

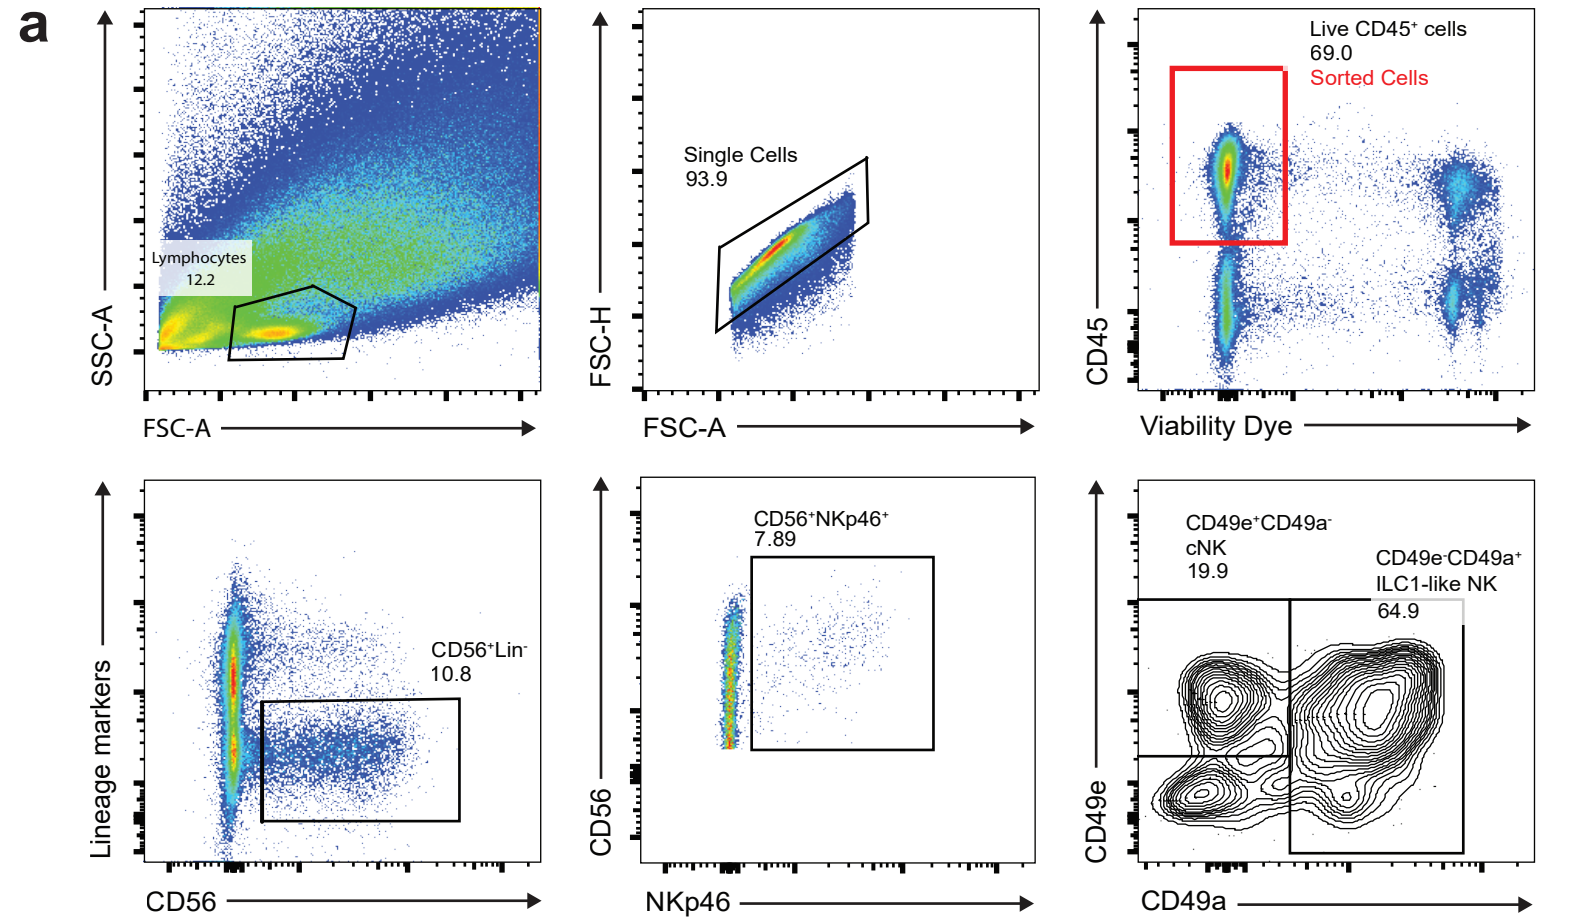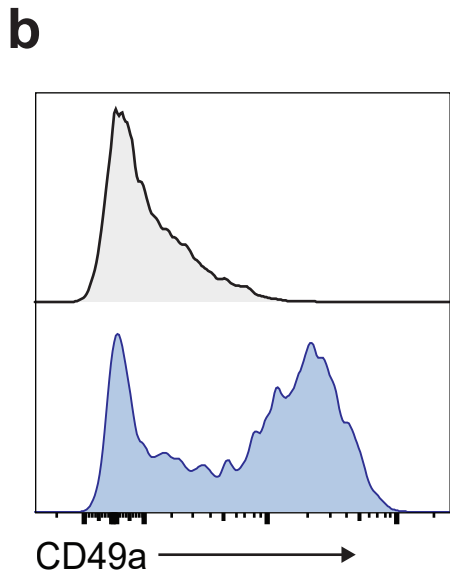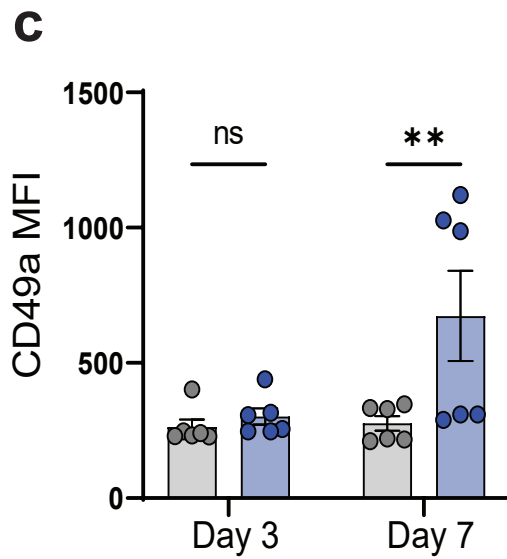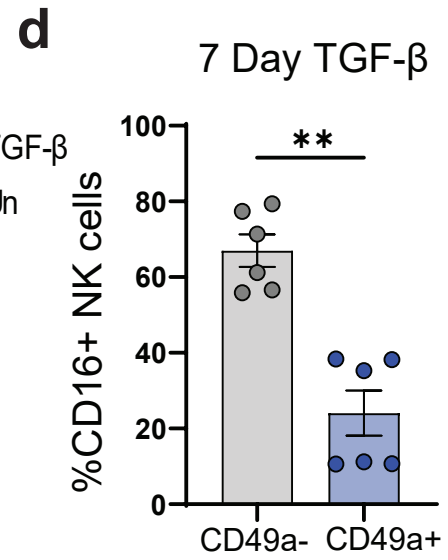

# Sup. Fig 5

a

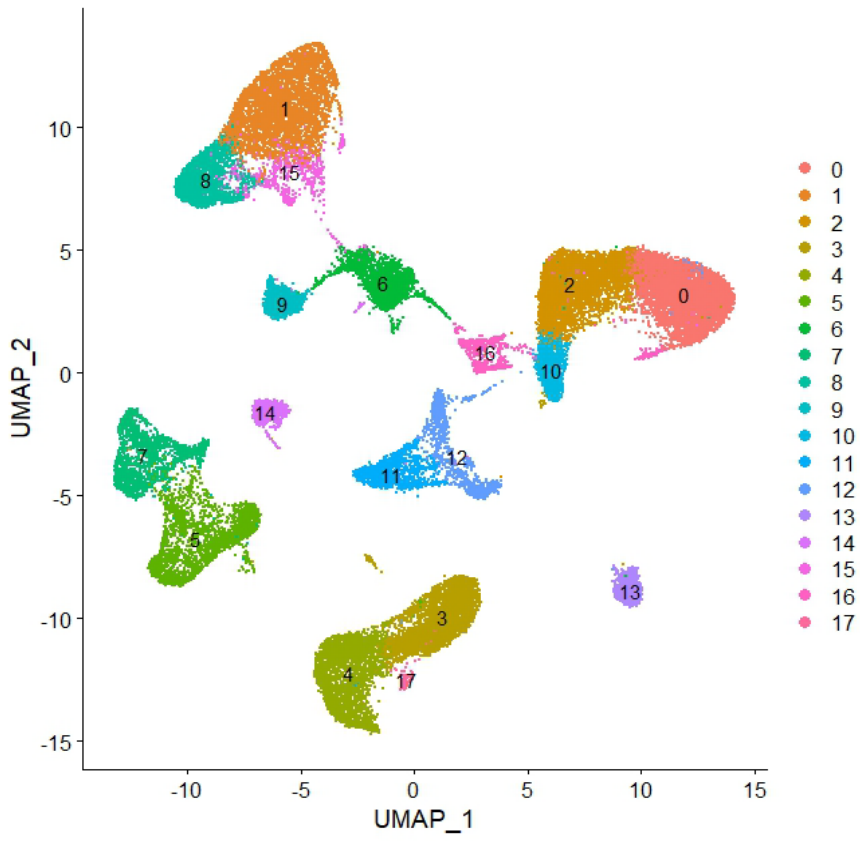

b

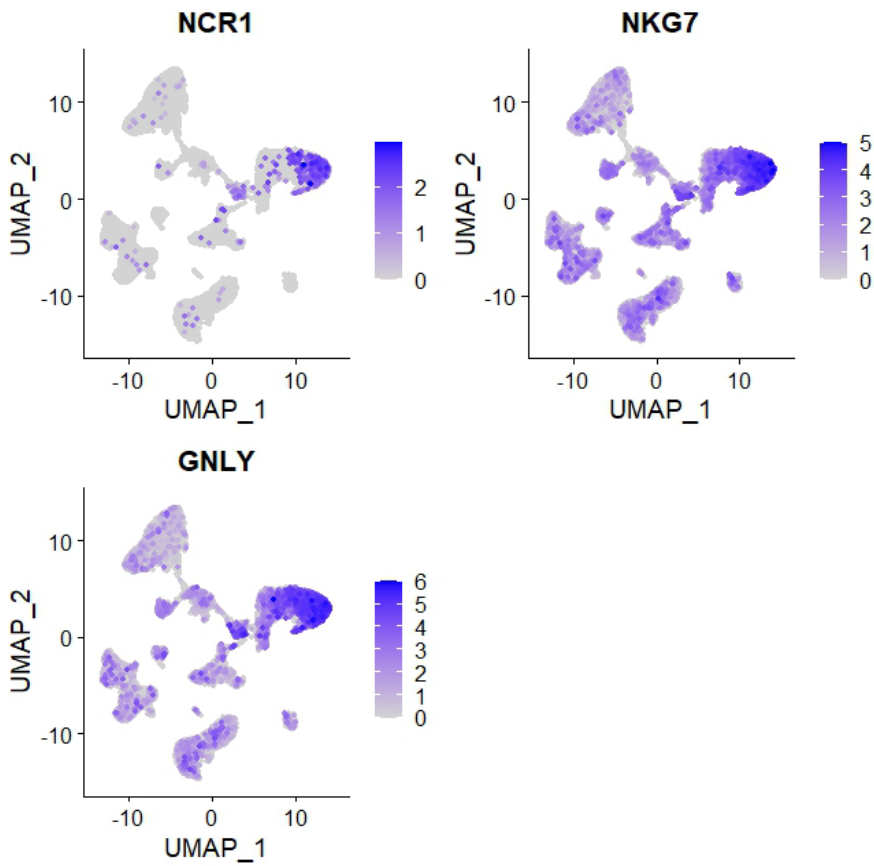

# Sup. Fig 6

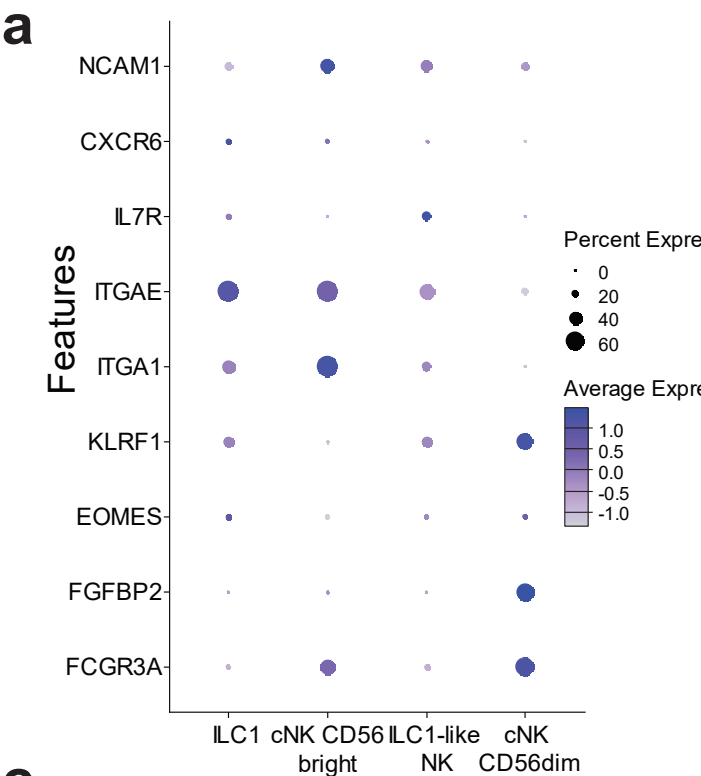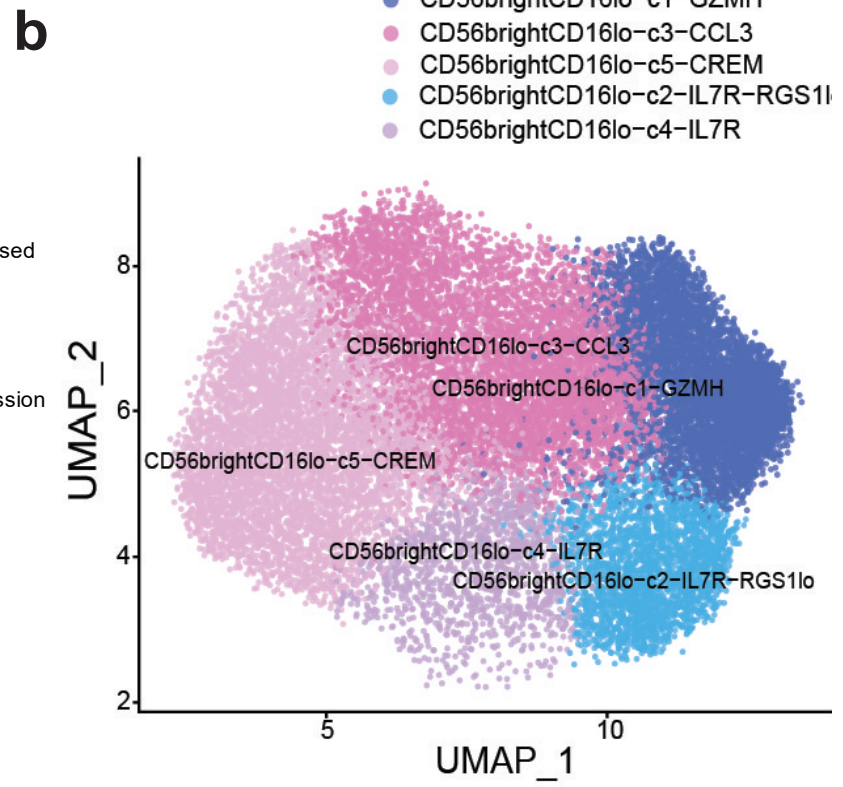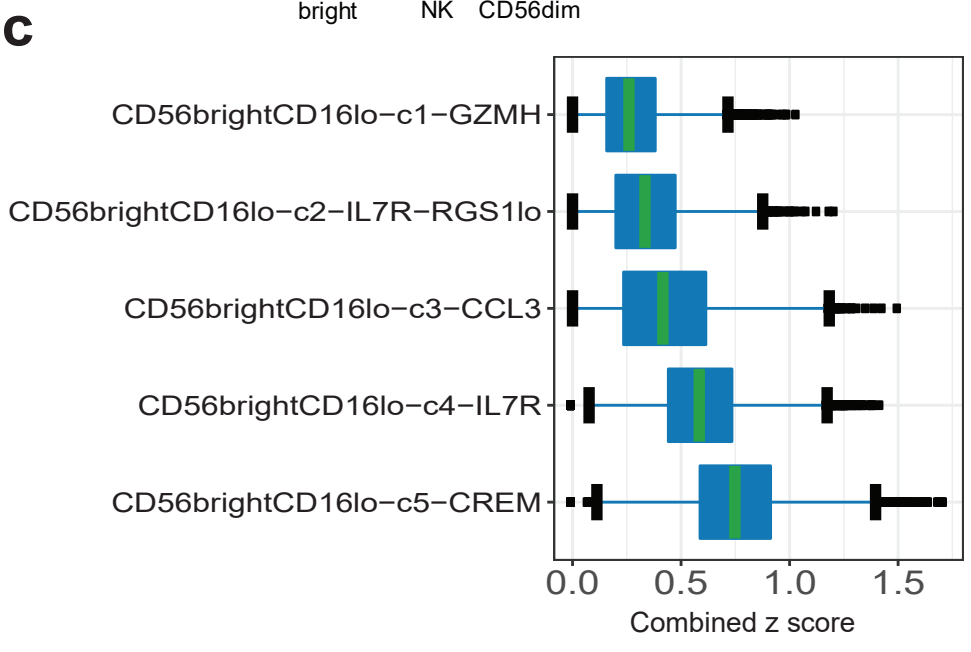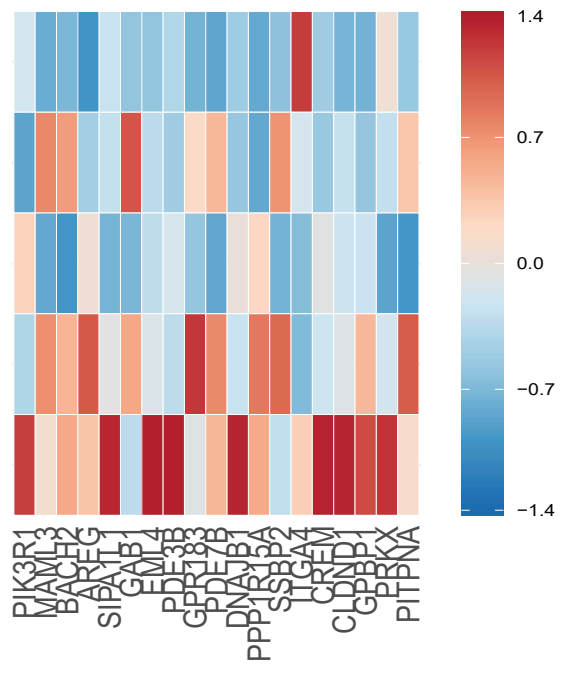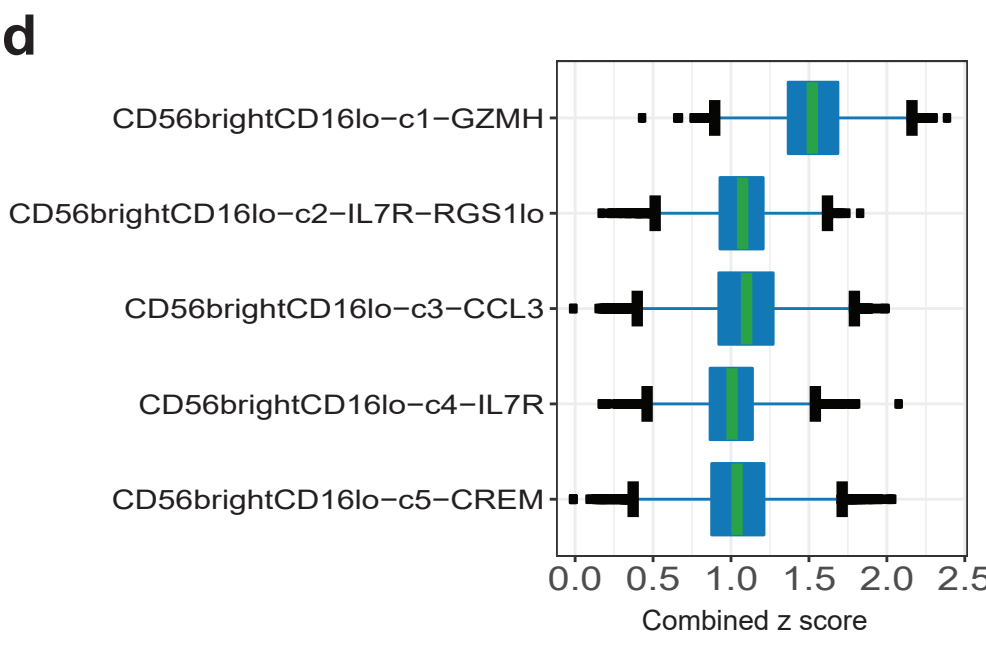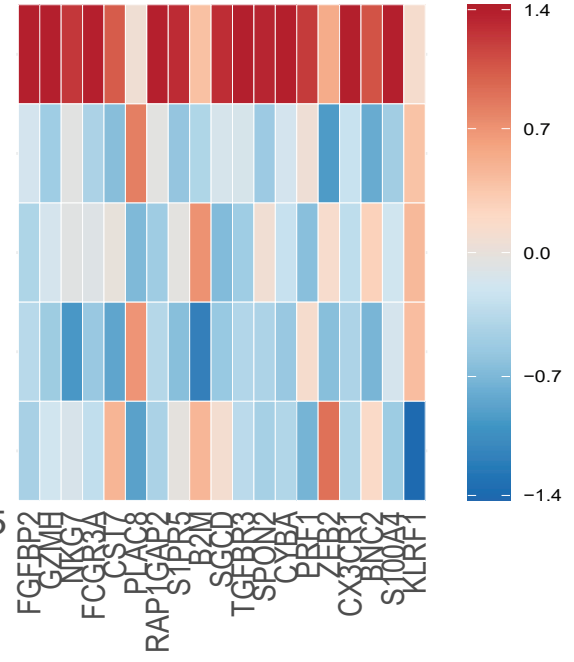

# Sup. Fig 7

**a**

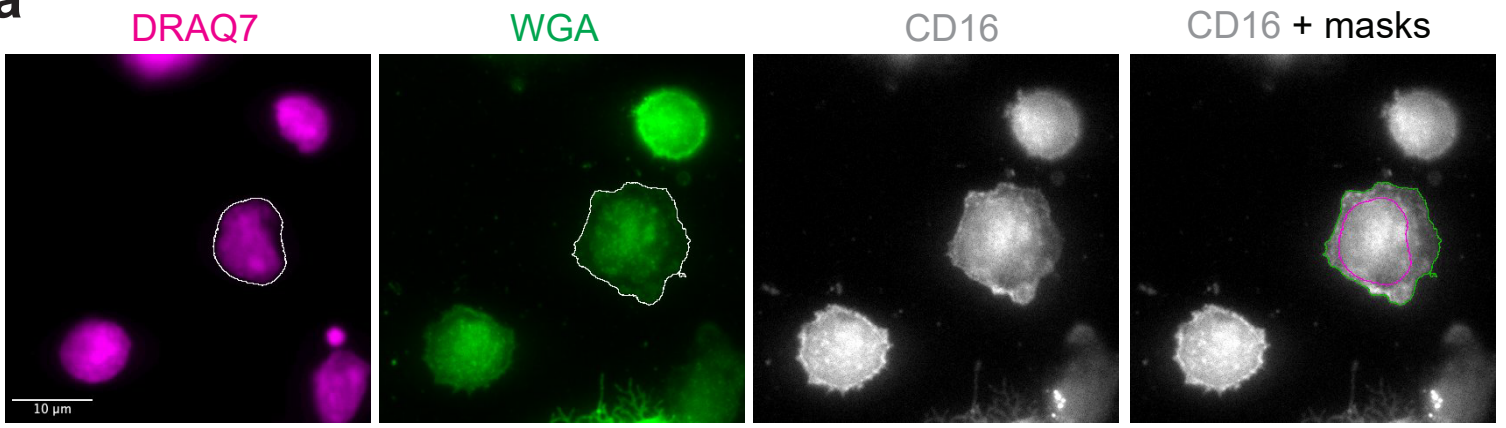

**b**

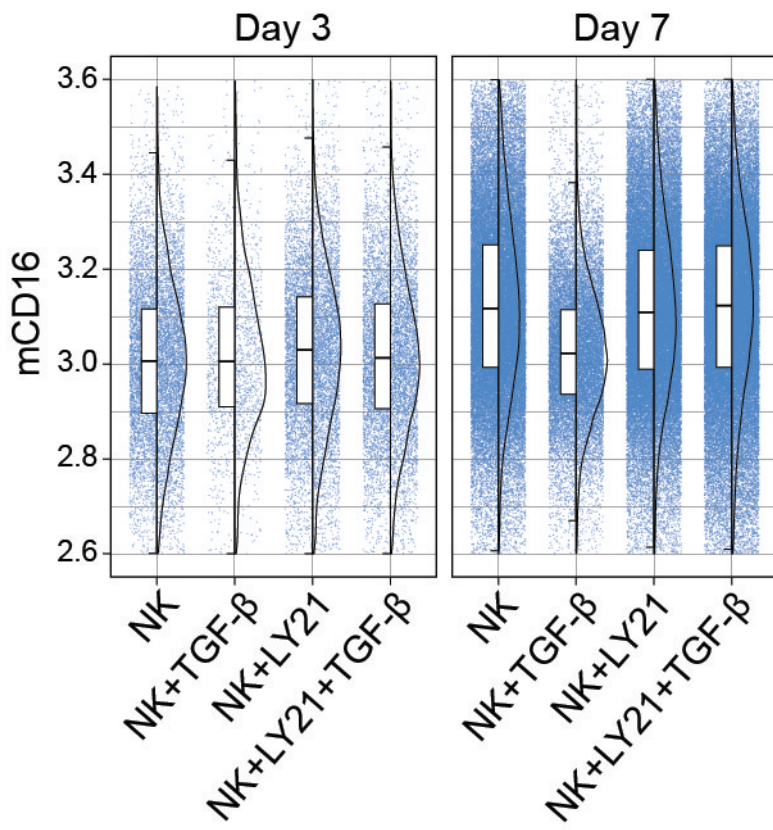

**c**

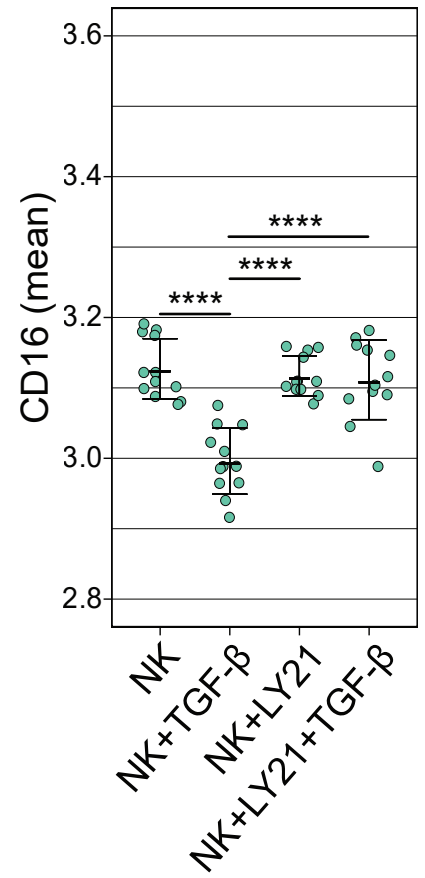

# Sup. Fig 8

**a**

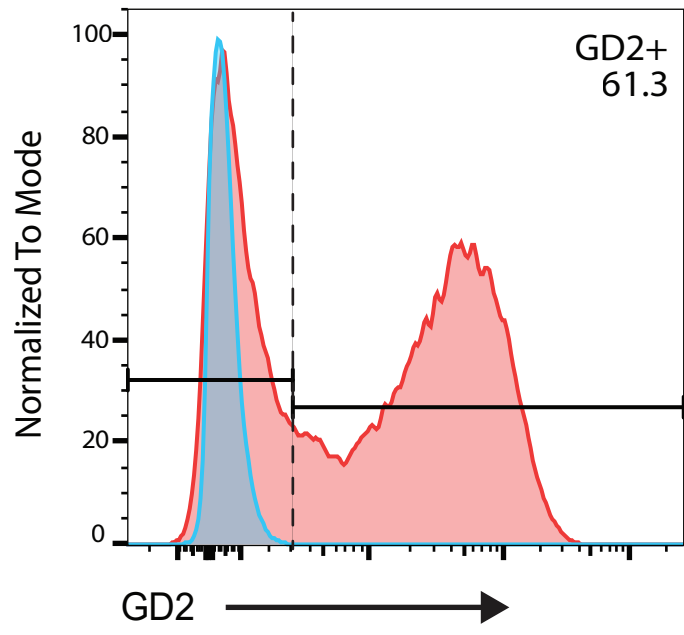

Supplement: mmc2.pdf [file mmc2.pdf]
